## **Predicting influenza H3N2 vaccine efficacy from evolution of the dominant epitope**

Melia E. Bonomo, Department of Physics and Astronomy and Center for Theoretical Biological Physics, Rice University, Houston, TX, USA

Michael W. Deem, Department of Bioengineering, Department of Physics and Astronomy and Center for Theoretical Biological Physics, Rice University, Houston, TX, USA

**Keywords:** influenza, influenza vaccine, vaccine efficacy, pEpitope, antigenic distance

**Running title:** Predicting influenza vaccine efficacy

**40-word summary of main point:** Our  $p_{\text{epitope}}$  model predicts the ability of the influenza vaccine to reduce the A(H3N2) disease attack rate, with an  $r^2=0.77$ . This fast, sequence-based method compliments strain-to-strain antigenic comparisons from ferret models and provides antigenic comparisons for all circulating sequences.

**Corresponding author:** Michael W. Deem, 6500 Main St, STE 1030, Rice University, Houston, TX 77030, USA; mwdeem@rice.edu, +17133485852.

**Alternate corresponding author:** Melia E. Bonomo, Dept. of Physics and Astronomy MS-61, Rice University, PO Box 1892, Houston, TX 77251, USA; meb16@rice.edu, +17133482204.

**Abstract:**

We predict vaccine efficacy with a measure of antigenic distance between influenza A(H3N2) and candidate vaccine viruses based on amino acid substitutions in the dominant epitopes. In 2016-2017, our model predicts 19% efficacy compared to 20% observed. This tool assists candidate vaccine selection by predicting human protection against circulating strains.

**Text:**

Seasonal influenza constitutes a significant disease burden worldwide, with three to five million cases of severe illness and an estimated annual death toll of 290,000 to 650,000; however, vaccination can provide protection [1]. The vaccine component against influenza A(H3N2) is especially important, as increased morbidity and mortality are associated with this most commonly predominant subtype [2]. Influenza type A viruses are primarily recognized by the immune system via two proteins on their surface, hemagglutinin (HA) and neuraminidase [3]. These viruses constantly evolve to evade human antibodies, most notably by introducing amino acid substitutions into the HA binding sites, designated epitopes *A* through *E* in A(H3N2) (Supplementary Figure 1). Some epitopes appear to play a more dominant role during infection than others, and the one under the greatest immune pressure in a given season will have the highest percentage of amino acid substitutions, computed by dividing the number of substitutions by the total number of amino acids in that epitope [4]. Increased antigenic distance between the vaccine and infecting virus leads to decreased vaccine efficacy. Due to virus evolution, the World Health Organization (WHO) recommends the composition of the seasonal influenza vaccine twice a year based on the dominant influenza strains from the previous northern or southern hemisphere season [5]. Several antigenically similar candidate vaccine viruses (CVVs) and associated reassortants are made available. Generally, the reassorted viruses used in manufacturing the vaccine are antigenically identical to their CVV prototypes in the HA region [6]. For the 2016-2017 northern hemisphere influenza season, WHO recommended A/Hong Kong/4801/2014 (H3N2)-like CVVs [5]. However, vaccine efficacy for adults aged 18-64 against A(H3N2) influenza was only  $20 \pm 8\%$  [2] (Supplementary Methods). Rather than an increased antigenic distance due to virus evolution, the 2016-2017 vaccine may have diverged

from circulating viruses due to substitutions acquired during isolation of the CVV strains in eggs [7]. Passaging-related adaptations have posed an issue for A(H3N2) CVVs in particular [8,9] (Supplementary Table 3).

We have previously derived a statistical mechanics model that captures the dynamics of human antibody-mediated response to viral infection following vaccination [10]. In a recent application of our theory, we used the evolution of the dominant HA epitope to predict vaccine efficacy, the ability of the vaccine to reduce the disease attack rate [4]. Here we generalize the model to A(H3N2) data both from the 1971-1972 to 2015-2016 influenza seasons and from highly consistent, laboratory-confirmed studies over the past decade. Additionally, we expand the prediction to encompass average efficacy against an abundance of diverse A(H3N2) strains for a given season. We apply this novel approach to quantify antigenic distance and expected efficacy of the egg-adapted CVVs against all strains circulating during the 2016-2017 and early 2017-2018 seasons.

## Methods

The epitope-based dependence of vaccine efficacy in our model comes from a measure of antigenic distance termed  $p_{\text{epitope}}$ , where

$$p_{\text{epitope}} = \frac{\text{number of substitutions in dominant epitope}}{\text{total number of amino acids in dominant epitope}} \quad (1)$$

In ferret models, the typical measure of antigenic distance  $d_1$  is the  $\log_2$  difference between vaccine antiserum titer against itself and the vaccine antiserum titer against a strain representative of the dominant circulating viruses [11]. A second measure  $d_2$  is the square-root ratio of the product of the homologous titers to the product of the heterologous titers [12]. We

perform linear regression with vaccine efficacy data reported by WHO collaborating centers to compare the predictive power of  $p_{\text{epitope}}$  with these ferret-based distances. We then utilize our model to evaluate the primary protein structure of egg-adapted A/Hong Kong/4801/2014 CVV in the context of the 2016-2017 season [5] and to predict efficacy of the egg-adapted CVV for the newly recommended A/Singapore/INFIMH-16-0019/2016 (H3N2)-like vaccine [13]. Finally, we calculate the average efficacy of the CVVs against 6610 circulating A(H3N2) strains collected from September 2016 to November 2017, a unique capability of our  $p_{\text{epitope}}$  measure of antigenic distance in comparison to other clinical studies.

## Results

Our use of  $p_{\text{epitope}}$  to correlate antigenic distance with vaccine efficacy yields a coefficient of determination  $r^2 = 0.77$  on both data since 1971 and data over just the past 10 years (Figure 1). Conventional ferret  $d_1$  has  $r^2 = 0.42$  on data since 1971 and has dropped to  $r^2 = 0.23$  on data over the past 10 years. The extracted equation to predict vaccine efficacy  $VE$  is

$$VE = -2.471p_{\text{epitope}} \pm 0.468 \quad (2)$$

where the standard error on the slope is  $\pm 0.254$  and the standard error on the y-intercept is  $\pm 0.032$  (Supplementary Methods).

We calculate  $p_{\text{epitope}} = 0.095$  between the egg-adapted A/Hong Kong CVV and A/Colorado/15/2014, a representative clade 3C.2a strain [7], and find the dominant epitope is  $B$ , with amino acid substitutions T160K and L194P. The reassorted CVVs contain some additional substitutions (Supplementary Figure 2), but as these substitutions are outside of the dominant epitope, we focus on the non-reassorted CVV for our analysis. Using Equation 2, we predict

vaccine efficacy against this A/Colorado strain to be  $23 \pm 4\%$  (Supplementary Table 1). The hemagglutination inhibition titers from post-infection ferret antisera reported for the 2016-2017 season [14] and our linear regressions of  $d_1$  and  $d_2$  predict vaccine efficacy to be  $27 \pm 5\%$  and  $28 \pm 4\%$ , respectively. Analysis of the reference A/Hong Kong strain, which was the clinical specimen collected from humans and expected to dominate in the population, reveals that this strain did not exhibit the epitope *B* substitutions. We predict it would have had a high  $47 \pm 3\%$  efficacy against A/Colorado.

When comparing the CVVs to all circulating strains during the 2016-2017 and early 2017-2018 seasons, we considered both  $p_{\text{epitope}}$  (Equation 1) and the Hamming distance, which is the number of differing amino acids between each pair of strains in HA subunit 1 divided by the total 328 amino acids of the subunit. While the Hamming distance between the reference A/Hong Kong specimen and the consensus sequence of the circulating strains is 0.006, that of the egg-adapted CVV's is 0.015 (Supplementary Figure 2). For the egg-adapted A/Hong Kong CVV, the average  $p_{\text{epitope}}$  is 0.111 due to substitutions in dominant epitope *B*, with an average predicted vaccine efficacy of  $19 \pm 4\%$ . The reference A/Singapore/INFIMH-16-0019/2016 specimen has a Hamming distance of 0.003 to the consensus strain, smaller than the reference A/Hong Kong specimen has, and that of its egg-adapted CVV is 0.012. We calculate that the egg-passaged A/Singapore CVV has an average  $p_{\text{epitope}}$  of 0.118, leading to a predicted average vaccine efficacy of  $18 \pm 4\%$ .

## Discussion

We quantify influenza virus evolution and predict the ability of the CVV to reduce the disease attack rate using our  $p_{\text{epitope}}$  measure of antigenic distance. While other factors influence real-world vaccine effectiveness in humans,  $p_{\text{epitope}}$  has accounted for much of the variance in CVV efficacy over the past 10 and 45 years ( $r^2 = 0.77$ ). The low vaccine performance against A(H3N2) during 2016-2017 appears to have been caused by the T160K and L194P substitutions that occurred in the dominant epitope *B* during egg-isolation of the A/Hong Kong CVV. Indeed, human antisera studies showed that individuals who had received the Flublok recombinant influenza vaccine (containing T160 and L194) that had been passaged in insect cells produced more effective antisera than did those who had received the inactivated influenza vaccines Fluzone or Flucelvax (containing K160 and P194) [7], which were both made from CVVs initially isolated in eggs [9]. Arguably, HA stability did not account for the larger response induced by Flublok, since all three vaccines induced a similar antisera response when challenged by K160-containing viruses [7].

It is critical to choose a vaccine strain with the minimal antigenic distance from all circulating A(H3N2) strains. While the reference A/Singapore specimen minimizes the Hamming distance, the reference A/Hong Kong specimen minimizes  $p_{\text{epitope}}$  (Supplementary Figure 3). WHO changed the recommended CVVs for the southern hemisphere because the egg-passaged A/Singapore CVV contains an N121K substitution that matches the majority of recent viruses, and ferret antisera were more successfully raised [13]. However, the egg-passaged A/Singapore CVV has two substitutions in residue *B* (T160K and L194P) that do not match the majority of circulating strains. We predict that this A/Singapore CVV will have comparable efficacy to the egg-passaged A/Hong Kong CVVs in humans.

The  $p_{\text{epitope}}$  of a pair of strains can be calculated nearly instantaneously or averaged for one strain against 6000 in seconds. By contrast, ferret models are restricted to a few analysis pairs, antisera production takes 3-5 weeks, and there is added difficulty due to strict biocontainment measures [9]. Additionally,  $p_{\text{epitope}}$  theory suggests which sequence discrepancies are contributing most to a lowered vaccine efficacy. We currently do not explicitly consider N-linked glycosylation, though  $p_{\text{epitope}}$  implicitly incorporates this seeing as discrepancies in glycosylation between two strains are generally due to amino acid substitutions, *e.g.*, T160K caused an observed lack of glycosylation site in the A/Hong Kong CVV as compared to circulating 3C.2a strains [7]. Our model can rapidly narrow down clinical specimens that are representative of viruses that will dominate the upcoming flu season. It can then be used in cooperation with ferret models to confirm that the CVVs and their associated reassortants have not acquired critical antigenic changes before the vaccine is manufactured and administered to the human population worldwide.



## **Funding**

This work was supported by the Center for Theoretical Biological Physics at Rice University, Houston TX [National Science Foundation, PHY 1427654] and the Welch Foundation [C--1917-20170325].

## **Conflict of Interest**

The authors declare that they have no competing financial interests.

## **Acknowledgments**

Influenza strain sequences were retrieved from the open access EpiFlu database hosted by GISAID: Global initiative on sharing all influenza data, accessible at <http://platform.gisaid.org/>. See Supplementary Table 2 for specific contributions of both the submitting and the originating laboratories.

## References

1. World Health Organization. Influenza (Seasonal) Fact sheet. Available at: <http://www.who.int>. Accessed 1 February 2018.
2. Flannery B, Chung JR, Thaker SN *et al*. Interim Estimates of 2016–17 Seasonal Influenza Vaccine Effectiveness — United States, February 2017. *Morbidity and Mortality Weekly Report*, **2017** ; 66: 167–171.
3. Gamblin SJ, Skehel JJ. Influenza hemagglutinin and neuraminidase membrane glycoproteins. *J Biol Chem*, **2010** ; 285: 28403–28409.
4. Li X, Deem MW. Influenza evolution and H3N2 vaccine effectiveness, with application to the 2014/2015 season. *Protein Engineering, Design and Selection*, **2016** ; 29: 309–316.
5. World Health Organization. *Weekly Epidemiological Record*, **2016** ; 91: 121–132.
6. Skowronski DM, Janjua NZ, De Serres G *et al*. Low 2012–13 Influenza Vaccine Effectiveness Associated with Mutation in the Egg-Adapted H3N2 Vaccine Strain Not Antigenic Drift in Circulating Viruses. *PLOS One*, **2014** ; 9: e92153.
7. Zost SJ, Parkhouse K, Gumina ME *et al*. Contemporary H3N2 influenza viruses have a glycosylation site that alters binding of antibodies elicited by egg-adapted vaccine strains. *Proceedings of the National Academy of Sciences USA*, **2017** ; 201712377.
8. Lin Y, Wharton SA, Whittaker L *et al*. The characteristics and antigenic properties of recently emerged subclade 3C.3a and 3C.2a human influenza A(H3N2) viruses passaged in MDCK cells.

Influenza and Other Respiratory Viruses, **2017** ; 11: 263-274.

9. World Health Organization. A Description of the Process of Seasonal and H5N1 Influenza Vaccine Virus Selection and Development. Available at: <http://www.who.int>. Accessed 1 February 2018.

10. Deem MW, Lee HY. Sequence space localization in the immune system response to vaccination and disease. Physical Review Letters, **2003** ; 91: 068101.

11. Smith DJ, Forrest S, Ackley DH, Perelson AS. Variable efficacy of repeated annual influenza vaccination. Proceedings of the National Academy of Sciences USA, **1999** ; 96: 14001– 14006.

12. Lee M-S, Chen JS-E. Predicting antigenic variants of influenza A/H3N2 viruses. Emerging infectious diseases, **2004** ; 10: 1385.

13. World Health Organization. Recommended composition of influenza virus vaccines for use in the 2018 southern hemisphere influenza season. Available at: <http://www.who.int>. Accessed 1 February 2018.

14. The Crick Worldwide Influenza Centre. Report prepared for the WHO annual consultation on the composition of influenza vaccine for the Northern Hemisphere 2017-2018. Available at <https://www.crick.ac.uk>. Accessed 1 February 2018.

**Figure 1.**

Influenza A(H3N2) vaccine efficacy as a function of three measures of antigenic distance. We plot  $p_{\text{epitope}}$  (red) from our model,  $d_1$  (green) and  $d_2$  (blue) from ferret serological studies [11,12], and the corresponding vaccine efficacy values for each influenza season. Linear regression of data from each measure of antigenic distance is shown for the past 45 years (solid lines) and for laboratory-confirmed studies in the past 10 years (dotted lines). The coefficients of determination ( $r^2$ ) are listed in the legend. Data for the 2016-2017 season are plotted separately (diamond points). The strong and consistent  $r^2$  between  $p_{\text{epitope}}$  and vaccine efficacy indicates that this model accurately predicts the data. We determined an average efficacy of  $19 \pm 4\%$  for the 2016-2017 egg-adapted A/Hong Kong/4801/2014 vaccine, whereas  $20 \pm 8\%$  was observed [2].

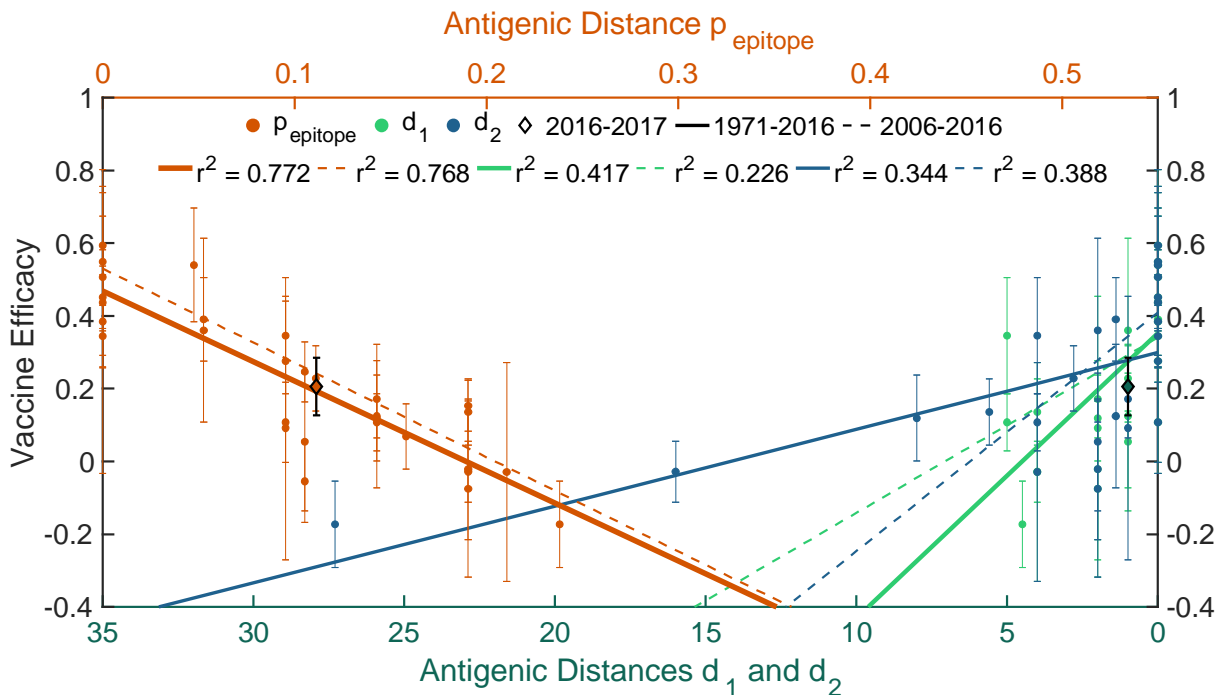

Source: http://biorxiv.org/content/10.1101/300665v1.full.pdf
